# Supplementary material for: Multi LC-MS/MS and LC-HRMS Methods for Determination of 24 Mycotoxins including Major Phase I and II Biomarker Metabolites in Biological Matrices from Pigs and Broiler Chickens
Source: PubMed Central journal article supplement (PMC6468661; doi:10.3390/toxins11030171), 2019-03-19
Supplement: toxins-11-00171-s001.pdf [file toxins-11-00171-s001.pdf]

# Supplementary Materials: Multi LC-MS/MS and LC-HRMS Methods for Determination of 24 Mycotoxins including Major Phase I and II Biomarker Metabolites in Biological Matrices from Pigs and Broiler Chickens

Marianne Lauwers, Siegrid De Baere, Ben Letor, Michael Rychlik, Siska Croubels and Mathias Devreese

**Table S1.** Overview of the theoretical accurate mass of the 24 mycotoxins and possible phase I and/or phase II metabolites.

| Name                      | Theoretical Accurate Mass (g/mol) | Name                                                         | Theoretical Accurate Mass (g/mol) |
|---------------------------|-----------------------------------|--------------------------------------------------------------|-----------------------------------|
| Deoxynivalenol            | 296.1260                          | <sup>13</sup> C <sub>15</sub> -Deoxynivalenol                | 311.1763                          |
| De-epoxy-deoxynivalenol   | 280.1311                          | <sup>13</sup> C <sub>17</sub> -Aflatoxin B1                  | 329.1204                          |
| 3/15-acetyldeoxynivalenol | 338.1366                          | <sup>13</sup> C <sub>20</sub> -Ochratoxin A                  | 423.1494                          |
| T2-toxin                  | 466.2203                          | <sup>13</sup> C <sub>24</sub> -T2-toxin                      | 490.3008                          |
| HT2-toxin                 | 424.2097                          | <sup>13</sup> C <sub>34</sub> -Fumonisin B1                  | 755.5025                          |
| Aflatoxin B1              | 312.0634                          | <sup>15</sup> N <sub>3</sub> -Enniatin B                     | 642.4006                          |
| Aflatoxicol               | 314.0790                          | <sup>13</sup> C <sub>6</sub> <sup>15</sup> N-Tenuazonic acid | 207.1387                          |
| Aflatoxin M1              | 328.0538                          | <sup>13</sup> C <sub>18</sub> -Zearalenone                   | 336.2071                          |
| Ochratoxin A              | 403.0823                          | Deoxynivalenol-glucuronide                                   | 472.1581                          |
| Enniatin A1               | 667.4408                          | De-epoxy-deoxynivalenol glucuronide                          | 456.1632                          |
| Enniatin A                | 681.4564                          | Deoxynivalenol-sulphate                                      | 376.0828                          |
| Enniatin B                | 639.4095                          | Deoxynivalenol-di-sulphate                                   | 456.0396                          |
| Enniatin B1               | 653.4251                          | 3/15-acetyl-deoxynivalenol-sulphate                          | 418.0934                          |
| Beauvericin               | 783.4095                          | Ochratoxin alfa                                              | 256.0139                          |
| Fumonisin B2              | 705.3936                          | Zearalenone-glucuronide                                      | 494.1788                          |
| Tenuazonic acid           | 197.1052                          | Zearalenone-di-glucuronide                                   | 670.2109                          |
| Alternariol               | 258.0528                          | $\alpha/\beta$ -zearalenol- or zearalanone-glucuronide       | 496.1945                          |
| Alternariol methyl ether  | 272.0685                          | Zearalenone-sulphate                                         | 398.1035                          |
| Zearalenone               | 318.1467                          | $\alpha/\beta$ -zearalenol- or zearalanone-sulphate          | 400.1192                          |
| Zearalanone               | 320.1624                          | $\alpha/\beta$ -zearalenol-sulphate                          | 402.1348                          |
| $\alpha$ -Zearalenol      | 320.1624                          | Tenuazonic acid-sulphate                                     | 277.0620                          |
| $\alpha$ -Zearalanol      | 322.1780                          | Alternariol-sulphate                                         | 338.0096                          |
| $\beta$ -Zearalanol       | 322.1780                          | Alternariol-methyl ether sulphate                            | 352.0253                          |
| $\beta$ -Zearalenol       | 320.1624                          |                                                              |                                   |

Item name: 20180112\_17  
Channel name: ZEN-GlcA [-H] : (50.0 PPM) 493.1710

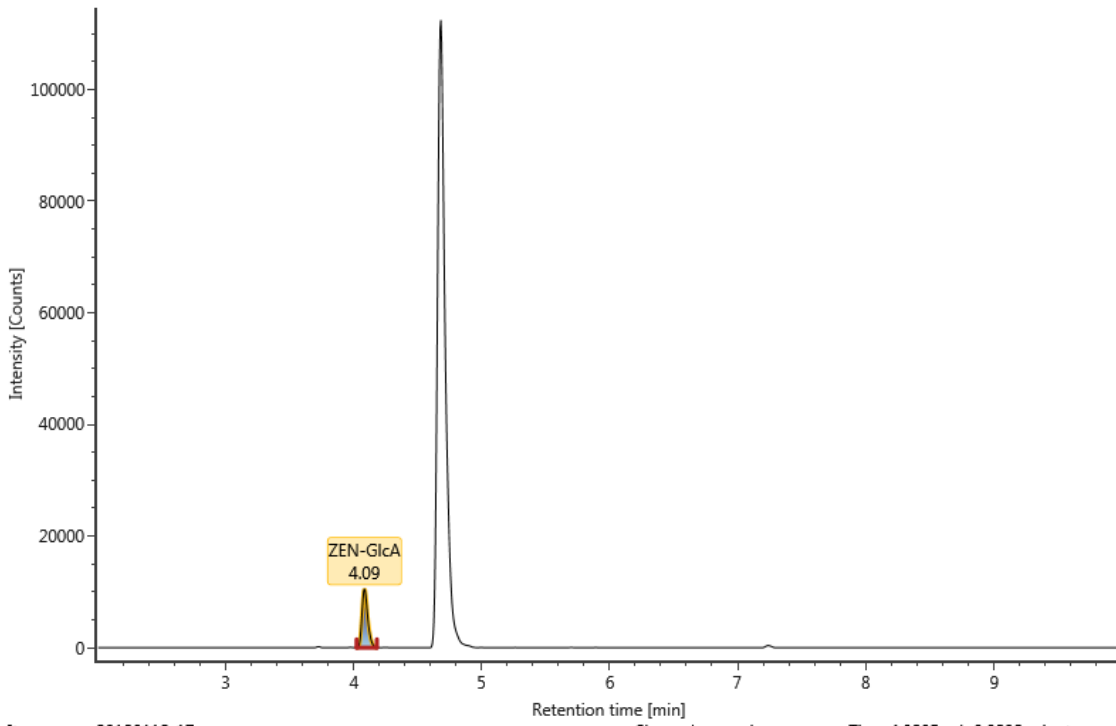

Item name: 20180112\_17  
Item description: Pig 7 5min dag 1

2.36e6

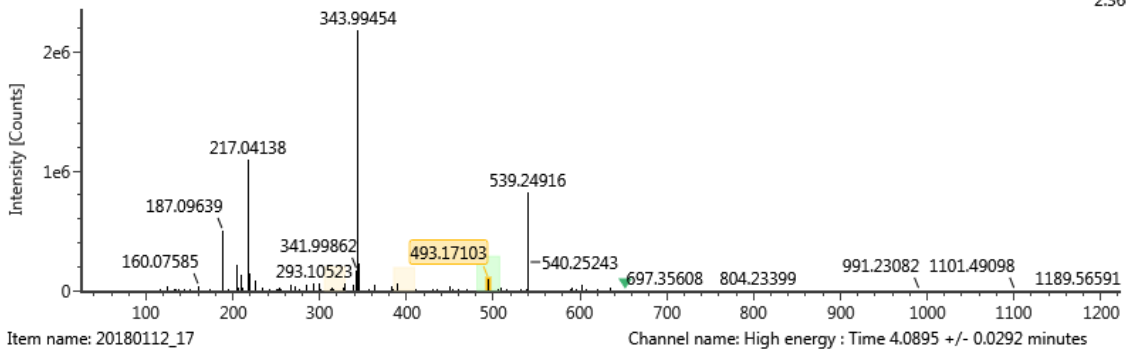

Item name: 20180112\_17  
Item description: Pig 7 5min dag 1

6.23e5

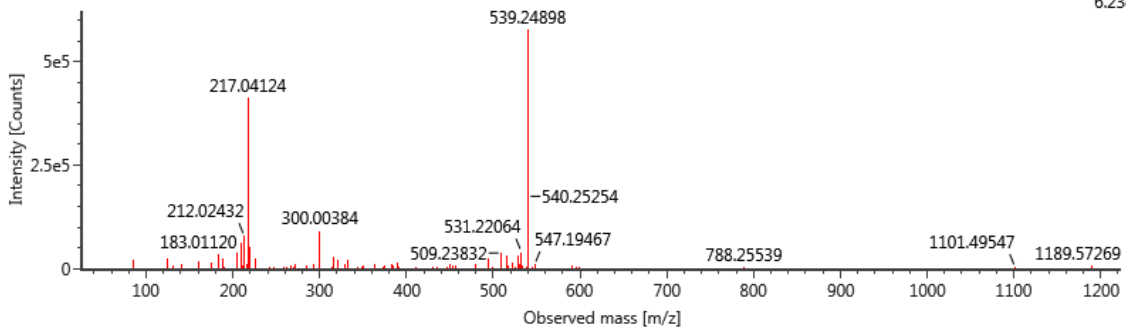

**Figure S1.** Extracted ion chromatogram of the first peak (4.09 min) in the trace of ZEN-glucuronide (ZEN-GlcA) [m/z 493.1788] with HRMS spectrum.

**Table S2.** Validation results for linearity (linear range, correlation coefficient (r) and goodness-of-fit coefficient (g)) and limit of quantification (LOQ) of 24 mycotoxins in pig faeces.

| Analyte   | Linearity ( <i>n</i> = 3 Different Days) |                 |              | LOQ<br>(ng/g) |
|-----------|------------------------------------------|-----------------|--------------|---------------|
|           | Linear Range (ng/g)                      | R ± SD          | g (%) ± SD   |               |
| ZEN       | 5–200                                    | 0.996 +/- 0.001 | 7.1 +/- 1.0  | 5.0           |
| AZEL      | 1–200                                    | 0.996 +/- 0.001 | 15.7 +/- 4.3 | 1.0           |
| AZAL      | 5–200                                    | 0.996 +/- 0.002 | 10.8 +/- 2.2 | 5.0           |
| BZAL      | 1–200                                    | 0.996 +/- 0.002 | 9.0 +/- 3.5  | 1.0           |
| BZEL      | 1–200                                    | 0.995 +/- 0.002 | 14.7 +/- 5.2 | 1.0           |
| ZAN       | 1–200                                    | 0.997 +/- 0.003 | 11.5 +/- 4.2 | 1.0           |
| TEA       | 1–200                                    | 0.999 +/- 0.000 | 18.7 +/- 0.9 | 1.0           |
| AOH       | 5–200                                    | 0.997 +/- 0.001 | 8.9 +/- 3.1  | 5.0           |
| AME       | 1–200                                    | 0.998 +/- 0.001 | 17.3 +/- 1.4 | 1.0           |
| DON       | 5–200                                    | 0.994 +/- 0.003 | 14.1 +/- 4.4 | 5.0           |
| DOM-1     | 5–200                                    | 0.997 +/- 0.000 | 8.8 +/- 3.1  | 5.0           |
| 3/15 ADON | 1–200                                    | 0.998 +/- 0.001 | 13.4 +/- 4.2 | 1.0           |
| T2        | 1–200                                    | 0.999 +/- 0.001 | 9.6 +/- 0.3  | 1.0           |
| HT2       | 5–200                                    | 0.994 +/- 0.004 | 12.6 +/- 4.1 | 5.0           |
| T2G       | 5–200                                    | 0.993 +/- 0.003 | 15.2 +/- 5.3 | 5.0           |
| AFB1      | 1–200                                    | 0.998 +/- 0.002 | 10.5 +/- 4.6 | 1.0           |
| AFM1      | 1–200                                    | 0.998 +/- 0.000 | 7.9 +/- 4.2  | 1.0           |
| OTA       | 1–200                                    | 0.997 +/- 0.001 | 8.9 +/- 2.5  | 1.0           |
| ENN A1    | 1–200                                    | 0.997 +/- 0.002 | 15.4 +/- 6.1 | 1.0           |
| ENNA      | 1–100                                    | 0.996 +/- 0.003 | 12.6 +/- 7.0 | 1.0           |
| ENNB      | 1–200                                    | 0.997 +/- 0.001 | 14.9 +/- 5.4 | 1.0           |
| ENNB1     | 1–200                                    | 0.997 +/- 0.002 | 15.2 +/- 5.1 | 1.0           |
| BEA       | 1–200                                    | 0.999 +/- 0.001 | 11.3 +/- 1.4 | 1.0           |

**Table S3.** Validation results for linearity (linear range, correlation coefficient (r) and goodness-of-fit coefficient (g)) and limit of quantification (LOQ) of 24 mycotoxins in pig urine.

| Analyte   | Linearity ( <i>n</i> = 3 Different Days) |                 |              | LOQ<br>(ng/mL) |
|-----------|------------------------------------------|-----------------|--------------|----------------|
|           | Linear Range (ng/mL)                     | R ± SD          | g (%) ± SD   |                |
| ZEN       | 1–200                                    | 0.999 +/- 0.000 | 7.5 +/- 4.8  | 1.0            |
| AZEL      | 1–200                                    | 0.998 +/- 0.001 | 10.8 +/- 7.0 | 1.0            |
| AZAL      | 1–200                                    | 0.998 +/- 0.002 | 11.8 +/- 6.6 | 1.0            |
| BZAL      | 1–200                                    | 0.999 +/- 0.000 | 6.3 +/- 3.0  | 1.0            |
| BZEL      | 1–200                                    | 0.997 +/- 0.001 | 12.2 +/- 2.1 | 1.0            |
| ZAN       | 1–200                                    | 0.998 +/- 0.001 | 13.1 +/- 5.2 | 1.0            |
| TEA       | 1–200                                    | 0.998 +/- 0.002 | 11.0 +/- 4.6 | 1.0            |
| AOH       | 1–200                                    | 0.995 +/- 0.003 | 16.8 +/- 3.2 | 1.0            |
| AME       | 1–200                                    | 0.997 +/- 0.001 | 10.2 +/- 2.3 | 1.0            |
| DON       | 1–200                                    | 0.998 +/- 0.001 | 9.3 +/- 1.1  | 1.0            |
| DOM-1     | 4–200                                    | 0.995 +/- 0.004 | 9.3 +/- 5.8  | 4.0            |
| 3/15 ADON | 1–200                                    | 0.998 +/- 0.001 | 11.9 +/- 5.0 | 1.0            |
| T2        | 1–200                                    | 0.999 +/- 0.000 | 9.7 +/- 3.7  | 1.0            |
| HT2       | 1–200                                    | 0.995 +/- 0.003 | 14.1 +/- 5.2 | 1.0            |
| T2G       | 2–200                                    | 0.996 +/- 0.002 | 17.0 +/- 1.9 | 2.0            |
| AFB1      | 1–200                                    | 0.999 +/- 0.000 | 5.1 +/- 4.2  | 1.0            |
| AFM1      | 1–100                                    | 0.997 +/- 0.004 | 10.5 +/- 7.8 | 1.0            |
| OTA       | 1–200                                    | 0.999 +/- 0.001 | 8.7 +/- 1.2  | 1.0            |
| ENN A1    | 1–200                                    | 0.999 +/- 0.001 | 11.2 +/- 1.9 | 1.0            |
| ENNA      | 1–200                                    | 0.998 +/- 0.002 | 7.6 +/- 4.6  | 1.0            |
| ENNB      | 1–200                                    | 0.999 +/- 0.000 | 3.5 +/- 2.7  | 1.0            |
| ENNB1     | 1–50                                     | 0.999 +/- 0.001 | 5.9 +/- 3.0  | 1.0            |
| BEA       | 1–100                                    | 0.999 +/- 0.000 | 11.2 +/- 5.3 | 1.0            |

**Table S4.** Validation results for linearity (linear range, correlation coefficient (r) and goodness-of-fit coefficient (g)) and limit of quantification (LOQ) of 24 mycotoxins in broiler chicken plasma.

| Analyte   | Linearity ( <i>n</i> = 3 Different Days) |                 |              | LOQ<br>(ng/mL) |
|-----------|------------------------------------------|-----------------|--------------|----------------|
|           | Linear Range (ng/mL)                     | R ± SD          | g (%) ± SD   |                |
| ZEN       | 1–200                                    | 0.998 +/- 0.001 | 8.0 +/- 6.4  | 1.0            |
| AZEL      | 1–200                                    | 0.998 +/- 0.001 | 15.4 +/- 6.5 | 1.0            |
| AZAL      | 1–200                                    | 0.997 +/- 0.003 | 12.0 +/- 5.2 | 1.0            |
| BZAL      | 1–200                                    | 0.998 +/- 0.002 | 9.7 +/- 4.5  | 1.0            |
| BZEL      | 1–200                                    | 0.998 +/- 0.001 | 10.1 +/- 6.0 | 1.0            |
| ZAN       | 1–200                                    | 0.998 +/- 0.001 | 12.2 +/- 4.1 | 1.0            |
| TEA       | 1–200                                    | 0.994 +/- 0.004 | 17.7 +/- 2.7 | 1.0            |
| AOH       | 1–200                                    | 0.997 +/- 0.002 | 13.6 +/- 5.8 | 1.0            |
| AME       | 1–100                                    | 0.997 +/- 0.002 | 15.6 +/- 5.6 | 1.0            |
| DON       | 1–200                                    | 0.998 +/- 0.001 | 12.4 +/- 3.8 | 1.0            |
| DOM-1     | 1–200                                    | 0.998 +/- 0.001 | 12.7 +/- 3.2 | 1.0            |
| 3/15 ADON | 1–200                                    | 0.999 +/- 0.001 | 8.7 +/- 1.3  | 1.0            |
| T2        | 1–200                                    | 0.997 +/- 0.003 | 7.7 +/- 3.7  | 1.0            |
| HT2       | 1–200                                    | 0.999 +/- 0.001 | 14.1 +/- 8.0 | 1.0            |
| T2G       | 5–200                                    | 0.996 +/- 0.004 | 9.0 +/- 5.0  | 5.0            |
| AFB1      | 1–200                                    | 0.998 +/- 0.002 | 6.3 +/- 4.3  | 1.0            |
| AFM1      | 1–200                                    | 0.998 +/- 0.001 | 8.9 +/- 5.0  | 1.0            |
| OTA       | 1–200                                    | 0.998 +/- 0.002 | 12.7 +/- 3.5 | 1.0            |
| ENN A1    | 1–200                                    | 0.999 +/- 0.000 | 7.9 +/- 1.0  | 1.0            |
| ENNA      | 1–200                                    | 0.998 +/- 0.001 | 16.2 +/- 4.3 | 1.0            |
| ENNB      | 1–100                                    | 0.999 +/- 0.000 | 5.9 +/- 3.1  | 1.0            |
| ENNB1     | 1–200                                    | 0.997 +/- 0.002 | 14.0 +/- 2.2 | 1.0            |
| BEA       | 1–200                                    | 0.999 +/- 0.001 | 8.9 +/- 5.4  | 1.0            |

**Table S5.** Validation results for linearity (linear range, correlation coefficient (r) and goodness-of-fit coefficient (g)) and limit of quantification (LOQ) of 25 mycotoxins in broiler chicken excreta.

| Analyte   | Linearity ( <i>n</i> = 3 Different Days) |                 |              | LOQ<br>(ng/g) |
|-----------|------------------------------------------|-----------------|--------------|---------------|
|           | Linear Range (ng/g)                      | R ± SD          | g (%) ± SD   |               |
| ZEN       | 1–200                                    | 0.998 +/- 0.001 | 14.8 +/- 3.1 | 1.0           |
| AZEL      | 1–200                                    | 0.998 +/- 0.001 | 13.2 +/- 4.8 | 1.0           |
| AZAL      | 1–200                                    | 0.996 +/- 0.003 | 15.1 +/- 6.7 | 1.0           |
| BZAL      | 1–200                                    | 0.997 +/- 0.002 | 13.9 +/- 4.7 | 1.0           |
| BZEL      | 1–200                                    | 0.996 +/- 0.003 | 14.8 +/- 1.8 | 1.0           |
| ZAN       | 1–200                                    | 0.999 +/- 0.001 | 13.7 +/-4.7  | 1.0           |
| TEA       | 1–200                                    | 0.998 +/- 0.001 | 12.4 +/- 4.6 | 1.0           |
| AOH       | 1–200                                    | 0.997 +/- 0.001 | 14.9 +/- 4.3 | 1.0           |
| AME       | 1–200                                    | 0.998 +/-0.000  | 13.5 +/-1.6  | 1.0           |
| DON       | 1–200                                    | 0.998 +/- 0.001 | 13.5 +/- 0.9 | 1.0           |
| DOM-1     | 1–200                                    | 0.998 +/- 0.001 | 13.5 +/- 3.9 | 1.0           |
| 3/15 ADON | 1–200                                    | 0.995 +/- 0.003 | 14.5 +/- 5.2 | 1.0           |
| T2        | 1–200                                    | 0.999 +/- 0.000 | 5.1 +/- 0.2  | 1.0           |
| HT2       | 4–100                                    | 0.997 +/-0.001  | 16.5 +/- 3.0 | 4.0           |
| T2G       | 2–200                                    | 0.998 +/-0.000  | 13.6 +/- 5.3 | 2.0           |
| AFB1      | 1–200                                    | 0.997 +/- 0.002 | 12.1 +/- 6.9 | 1.0           |
| AFM1      | 1–200                                    | 0.998 +/- 0.002 | 12.2 +/- 3.1 | 1.0           |
| OTA       | 1–200                                    | 0.998 +/- 0.001 | 11.4 +/- 5.0 | 1.0           |
| ENN A1    | 1–200                                    | 0.995 +/- 0.004 | 16.8 +/- 4.9 | 1.0           |
| ENNA      | 1–200                                    | 0.995 +/- 0.003 | 15.9 +/- 1.4 | 1.0           |
| ENNB      | 1–200                                    | 0.998 +/- 0.001 | 11.4 +/- 3.7 | 1.0           |
| ENNB1     | 1–200                                    | 0.997 +/- 0.001 | 15.4 +/-3.8  | 1.0           |
| BEA       | 1–200                                    | 0.995 +/- 0.002 | 15.4 +/-4.3  | 1.0           |
| FB2       | 10–200                                   | 0.993 +/- 0.003 | 13.9+/-4.7   | 10            |

**Table S6.** Results of the within-day and between-day precision and accuracy experiments for 24 mycotoxins in pig faeces.

| Analyte   | Within-Day Precision and Accuracy ( <i>n</i> = 6) |              |                                   |              |                                    |              | Between-Day Precision and Accuracy ( <i>n</i> = 6) |              |                                   |              |                                    |              |
|-----------|---------------------------------------------------|--------------|-----------------------------------|--------------|------------------------------------|--------------|----------------------------------------------------|--------------|-----------------------------------|--------------|------------------------------------|--------------|
|           | Theoretical Concentration LOQ                     |              | Theoretical Concentration 10 ng/g |              | Theoretical Concentration 100 ng/g |              | Theoretical Concentration LOQ                      |              | Theoretical Concentration 10 ng/g |              | Theoretical Concentration 100 ng/g |              |
|           | Precision (RSD %)                                 | Accuracy (%) | Precision (RSD %)                 | Accuracy (%) | Precision (RSD %)                  | Accuracy (%) | Precision (RSD%)                                   | Accuracy (%) | Precision (RSD%)                  | Accuracy (%) | Precision (RSD %)                  | Accuracy (%) |
| ZEN       | 16.1                                              | -21.2        | 3.7                               | -10.4        | 9.3                                | -3.2         | 21.2                                               | -11.2        | 5.2                               | -10.4        | 9.7                                | -4.2         |
| AZEL      | 6.9                                               | 1.6          | 7.2                               | -0.8         | 8.3                                | -1.7         | 28.0                                               | 4.0          | 6.1                               | 1.3          | 6.8                                | -2.9         |
| AZAL      | 3.3                                               | 10           | 6.5                               | 2.5          | 1.3                                | -0.6         | 4.9                                                | 6.8          | 6.1                               | 0.1          | 2.8                                | -2.4         |
| BZAL      | 5.3                                               | -17.6        | 7.9                               | -0.8         | 5.0                                | 1.00         | 22.4                                               | -10.1        | 12.1                              | -5.3         | 9.5                                | -2.0         |
| BZEL      | 22.4                                              | -29.0        | 2.8                               | -5.6         | 6.7                                | -4.7         | 37.9                                               | -3.6         | 9.0                               | -0.5         | 5.3                                | -5.0         |
| ZAN       | 21.6                                              | -10.0        | 5.0                               | 3.9          | 7.0                                | 1.1          | 28.5                                               | -19.5        | 9.0                               | 0.6          | 7.8                                | 2.9          |
| TEA       | 11.0                                              | 18.2         | 6.7                               | -4.0         | 4.1                                | -7.6         | 27.7                                               | 12.5         | 8.5                               | -3.0         | 8.8                                | -3.6         |
| AOH       | 14.1                                              | -5.5         | 11.0                              | -3.4         | 5.9                                | -1.1         | 19.3                                               | -5.9         | 11.9                              | -7.3         | 6.3                                | 1.6          |
| AME       | 19.4                                              | -24.4        | 3.9                               | -9.2         | 8.4                                | 4.6          | 39.2                                               | -18.9        | 7.8                               | -8.5         | 8.3                                | 4.0          |
| DON       | 8.0                                               | -8.7         | 5.6                               | -19.0        | 6.0                                | -18.9        | 7.7                                                | -5.6         | 11.7                              | -12.4        | 12.7                               | -12.5        |
| DOM-1     | 11.6                                              | -4.0         | 9.7                               | -7.3         | 5.5                                | -2.8         | 10.5                                               | -0.8         | 10.2                              | -7.0         | 7.3                                | -1.9         |
| 3/15 ADON | 24.9                                              | 4.6          | 8.6                               | -13.6        | 7.9                                | -14.4        | 22.6                                               | -0.8         | 7.5                               | -10.5        | 9.9                                | -8.6         |
| T2        | 22.7                                              | 8.4          | 6.5                               | 3.3          | 3.9                                | 0.9          | 24.1                                               | -0.5         | 6.2                               | 2.8          | 4.1                                | 3.1          |
| HT2       | 7.7                                               | 1.1          | 7.0                               | 1.0          | 7.2                                | -5.6         | 6.1                                                | 1.4          | 10.1                              | 4.3          | 8.0                                | -2.0         |
| T2G       | 22.2                                              | -3.4         | 7.9                               | 1.9          | 7.5                                | 2.0          | 17.8                                               | -0.1         | 8.6                               | -3.5         | 8.2                                | 4.8          |
| AFB1      | 18.6                                              | -6.0         | 3.5                               | 3.3          | 5.3                                | 1.4          | 22.8                                               | -9.9         | 5.6                               | 1.6          | 4.1                                | 1.8          |
| AFM1      | 21.7                                              | -1.6         | 2.2                               | -1.7         | 6.1                                | -4.0         | 29.9                                               | 6.0          | 1.9                               | -1.5         | 7.6                                | 0.5          |
| OTA       | 20.6                                              | -8.8         | 4.4                               | -5.3         | 3.8                                | -3.8         | 18.8                                               | -12.0        | 6.5                               | -4.1         | 5.3                                | -0.4         |
| ENN A1    | 11.3                                              | -10.7        | 6.6                               | 9.9          | 7.0                                | 6.5          | 25.3                                               | 0.5          | 11.4                              | 3.2          | 10.9                               | -1.7         |
| ENNA      | 21.5                                              | -17.6        | 13.4                              | -5.8         | 5.7                                | -3.9         | 29.7                                               | -22.8        | 15.7                              | 0.8          | 13.0                               | 1.5          |
| ENNB      | 18.4                                              | -7.2         | 6.6                               | 6.0          | 4.3                                | 2.3          | 21.7                                               | 4.5          | 7.3                               | 5.4          | 15.4                               | -7.9         |
| ENNB1     | 22.2                                              | -9.1         | 5.7                               | -2.7         | 9.0                                | -8.6         | 30.8                                               | -20.9        | 13.1                              | 4.9          | 10.8                               | -6.1         |
| BEA       | 20.8                                              | -0.8         | 13.3                              | -7.9         | 8.9                                | 1.0          | 25.6                                               | 15.8         | 17.0                              | 1.4          | 12.4                               | -0.7         |

**Table S7.** Results of the within-day and between-day precision and accuracy experiments for 24 mycotoxins in pig urine.

| Analyte  | Within-Day Precision and Accuracy ( <i>n</i> = 6) |              |                                    |              |                                     |              | Between-Day Precision and Accuracy ( <i>n</i> = 6) |              |                                    |              |                                     |              |
|----------|---------------------------------------------------|--------------|------------------------------------|--------------|-------------------------------------|--------------|----------------------------------------------------|--------------|------------------------------------|--------------|-------------------------------------|--------------|
|          | Theoretical Concentration LOQ                     |              | Theoretical Concentration 10 ng/mL |              | Theoretical Concentration 100 ng/mL |              | Theoretical Concentration LOQ                      |              | Theoretical Concentration 10 ng/mL |              | Theoretical Concentration 100 ng/mL |              |
|          | Precision (RSD %)                                 | Accuracy (%) | Precision (RSD %)                  | Accuracy (%) | Precision (RSD %)                   | Accuracy (%) | Precision (RSD%)                                   | Accuracy (%) | Precision (RSD%)                   | Accuracy (%) | Precision (RSD %)                   | Accuracy (%) |
| ZEN      | 12.0                                              | -5.5         | 8.8                                | -5.8         | 2.4                                 | -4.3         | 10.1                                               | -6.2         | 7.2                                | -5.4         | 2.8                                 | -3.1         |
| AZEL     | 10.7                                              | -12.6        | 11.6                               | -10.5        | 4.6                                 | -7.4         | 12.6                                               | -5.6         | 10.0                               | -8.1         | 6.7                                 | -4.2         |
| AZAL     | 9.8                                               | 14.3         | 12.2                               | -10.6        | 4.1                                 | -15.1        | 7.9                                                | 12.1         | 9.7                                | -9.5         | 9.5                                 | -8.8         |
| BZAL     | 6.5                                               | 15.4         | 4.3                                | 3.1          | 3.2                                 | -1.3         | 6.5                                                | 15.4         | 4.3                                | 3.1          | 3.2                                 | -1.3         |
| BZEL     | 13.5                                              | -18.3        | 1.8                                | 5.5          | 4.2                                 | -7.5         | 12.1                                               | -21.4        | 1.7                                | 6.1          | 4.6                                 | -5.8         |
| ZAN      | 5.6                                               | -4.0         | 2.0                                | 7.9          | 6.4                                 | -4.0         | 16.1                                               | -8.5         | 3.4                                | 7.1          | 5.2                                 | -3.2         |
| TEA      | 21.6                                              | -17.1        | 6.7                                | -10.5        | 7.5                                 | -0.2         | 18.9                                               | -10.9        | 8.2                                | -7.5         | 7.1                                 | 1.0          |
| AOH      | 24.8                                              | -7.0         | 14.0                               | -8.5         | 7.2                                 | 2.6          | 32.1                                               | -15.0        | 11.6                               | -7.9         | 10.8                                | -3.1         |
| AME      | 21.3                                              | -1.5         | 6.3                                | 1.6          | 6.5                                 | 2.7          | 20.3                                               | -5.0         | 17.0                               | -7.1         | 14.8                                | -4.8         |
| DON      | 10.7                                              | -14.3        | 4.8                                | -2.7         | 5.9                                 | 1.4          | 10.7                                               | -14.3        | 4.8                                | -2.7         | 5.9                                 | 1.4          |
| DOM-1    | 12.6                                              | 1.3          | 13.6                               | 3.4          | 9.6                                 | -2.9         | 9.0                                                | 2.1          | 12.0                               | -0.5         | 9.3                                 | 2.5          |
| 3/15ADON | 17.4                                              | 14.5         | 4.9                                | 3.5          | 5.5                                 | -0.3         | 14.8                                               | 11.5         | 5.0                                | 2.6          | 7.2                                 | -1.7         |
| T2       | 4.7                                               | 17.2         | 5.4                                | 2.0          | 2.8                                 | 5.7          | 11.4                                               | 10.2         | 5.3                                | 0            | 4.3                                 | 3.2          |
| HT2      | 20.9                                              | -10.0        | 8.6                                | -16.9        | 3.4                                 | -7.4         | 23.1                                               | -11.1        | 10.2                               | -17.4        | 3.4                                 | -7.8         |
| T2G      | 24.4                                              | -8.4         | 5.1                                | 4.7          | 4.8                                 | -1.7         | 28.2                                               | -14.1        | 12.6                               | -2.3         | 8.3                                 | -5.0         |
| AFB1     | 6.0                                               | -8.0         | 3.0                                | 2.0          | 1.7                                 | -1.2         | 16.0                                               | -12.8        | 3.4                                | 1.5          | 1.9                                 | -0.7         |
| AFM1     | 7.0                                               | 19.2         | 7.6                                | 4.9          | 5.6                                 | -9.7         | 22.1                                               | 5.2          | 6.8                                | 2.6          | 8.8                                 | -8.4         |
| OTA      | 10.7                                              | -1.0         | 5.6                                | -2.8         | 4.7                                 | 2.9          | 9.5                                                | 2.1          | 4.4                                | -3.3         | 4.3                                 | 2.4          |
| ENN A1   | 1.8                                               | 10.3         | 4.0                                | 1.9          | 6.3                                 | -5.2         | 5.6                                                | 6.8          | 3.3                                | 1.7          | 5.5                                 | -6.8         |
| ENNA     | 7.5                                               | -6.1         | 4.0                                | -15.1        | 9.4                                 | -11.7        | 6.4                                                | -5.1         | 4.9                                | -12.7        | 8.7                                 | -11.1        |
| ENNB     | 3.4                                               | 9.1          | 4.4                                | -0.4         | 8.2                                 | -11.9        | 10.1                                               | 2.3          | 3.7                                | -1.2         | 6.4                                 | -10.6        |
| ENNB1    | 3.5                                               | 14.8         | 2.8                                | 2.7          | 7.1                                 | -1.2         | 6.0                                                | 12.6         | 3.1                                | 2.4          | 5.8                                 | -1.1         |
| BEA      | 1.7                                               | -1.7         | 7.5                                | -5.7         | 9.3                                 | -8.2         | 6.8                                                | -6.4         | 6.2                                | -4.7         | 11.1                                | -7.9         |



**Table S8.** Results of the within-day and between-day precision and accuracy experiments for 24 mycotoxins in broiler chicken plasma.

| Analyte  | Within-Day Precision and Accuracy ( <i>n</i> = 6) |              |                                    |              |                                     |              | Between-Day Precision and Accuracy ( <i>n</i> = 6) |              |                                    |              |                                     |              |
|----------|---------------------------------------------------|--------------|------------------------------------|--------------|-------------------------------------|--------------|----------------------------------------------------|--------------|------------------------------------|--------------|-------------------------------------|--------------|
|          | Theoretical Concentration LOQ                     |              | Theoretical Concentration 10 ng/mL |              | Theoretical Concentration 100 ng/mL |              | Theoretical Concentration LOQ                      |              | Theoretical Concentration 10 ng/mL |              | Theoretical Concentration 100 ng/mL |              |
|          | Precision (RSD %)                                 | Accuracy (%) | Precision (RSD %)                  | Accuracy (%) | Precision (RSD %)                   | Accuracy (%) | Precision (RSD%)                                   | Accuracy (%) | Precision (RSD%)                   | Accuracy (%) | Precision (RSD %)                   | Accuracy (%) |
| ZEN      | 16.8                                              | 17.1         | 4.7                                | -6.5         | 4.0                                 | -3.7         | 22.3                                               | 8.0          | 5.4                                | -5.2         | 4.9                                 | -3.3         |
| AZEL     | 10.2                                              | -16.3        | 2.9                                | -15.7        | 9.5                                 | -8.7         | 29.6                                               | -6.9         | 10.6                               | -11.8        | 8.9                                 | -4.1         |
| AZAL     | 17.4                                              | -34.3        | 5.5                                | -19.7        | 7.8                                 | -9.4         | 36.0                                               | -25.4        | 11.9                               | -13.3        | 8.0                                 | -5.4         |
| BZAL     | 14.6                                              | -9.0         | 10.3                               | -19.5        | 8.6                                 | -16.5        | 18.0                                               | -0.2         | 13.8                               | -14.1        | 11.4                                | -10.2        |
| BZEL     | 21.1                                              | 7.8          | 11.1                               | -15.0        | 8.8                                 | -16.5        | 22.9                                               | 2.1          | 11.8                               | -9.9         | 13.6                                | -8.8         |
| ZAN      | 21.2                                              | -2.1         | 8.2                                | -8.1         | 8.1                                 | -2.3         | 21.1                                               | -8.2         | 6.5                                | -6.4         | 7.7                                 | -3.1         |
| TEA      | 22.3                                              | -7.5         | 11.5                               | -19.7        | 8.0                                 | -3.6         | 17.8                                               | 0.4          | 13.6                               | -13.3        | 11.4                                | -5.3         |
| AOH      | 21.1                                              | -3.3         | 9.6                                | -0.2         | 8.6                                 | 2.7          | 18.2                                               | 0.2          | 12.1                               | -5.4         | 8.7                                 | 0.5          |
| AME      | 9.2                                               | -9.3         | 4.5                                | 8.7          | 8.9                                 | 6.8          | 19.7                                               | -8.2         | 5.2                                | 5.6          | 15.6                                | 8.6          |
| DON      | 22.7                                              | 14.0         | 9.4                                | 1.8          | 4.5                                 | -4.0         | 18.6                                               | 8.9          | 9.0                                | -0.6         | 4.7                                 | -4.5         |
| DOM-1    | 12.8                                              | -9.4         | 6.9                                | 2.9          | 5.4                                 | -9.7         | 15.7                                               | -14.5        | 8.1                                | 2.7          | 6.8                                 | -5.7         |
| 3/15ADON | 3.9                                               | 19.6         | 13.2                               | 2.7          | 6.4                                 | -19.1        | 12.6                                               | 14.7         | 13.8                               | -2.9         | 13.2                                | -10.7        |
| T2       | 3.5                                               | 2.2          | 7.7                                | -5.9         | 5.3                                 | -2.0         | 6.7                                                | -1.4         | 7.8                                | -3.9         | 7.9                                 | -3.0         |
| HT2      | 16.9                                              | -6.0         | 4.0                                | -19.6        | 6.0                                 | -18.8        | 19.4                                               | -11.4        | 10.8                               | -14.5        | 12.1                                | -11.2        |
| T2G      | 4.5                                               | 5.6          | 10.6                               | 7.7          | 7.4                                 | 0.0          | 4.5                                                | 5.6          | 8.3                                | 9.1          | 7.1                                 | 3.6          |
| AFB1     | 4.0                                               | 7.0          | 3.8                                | -3.2         | 3.3                                 | -3.2         | 10.1                                               | 0            | 4.4                                | -3.9         | 4.7                                 | -3.8         |
| AFM1     | 17.4                                              | -28.4        | 6.1                                | -17.1        | 8.3                                 | -19.9        | 17.4                                               | -28.4        | 10.2                               | -13.4        | 12.0                                | -12.5        |
| OTA      | 24.2                                              | -7.2         | 3.8                                | -2.7         | 2.6                                 | -5.0         | 23.8                                               | -15.1        | 4.4                                | -4.8         | 3.1                                 | -5.7         |
| ENN A1   | 10.2                                              | -30.7        | 12.7                               | 0.8          | 8.9                                 | -15.4        | 24.2                                               | -17.3        | 10.6                               | -1.7         | 13.5                                | -7.5         |
| ENNA     | 20.4                                              | -15.1        | 9.7                                | 2.0          | 8.0                                 | -12.3        | 14.2                                               | -14.1        | 8.1                                | 1.2          | 9.8                                 | -8.1         |
| ENNB     | 2.1                                               | 5.6          | 3.5                                | -8.0         | 4.4                                 | -2.6         | 7.7                                                | 2.1          | 3.2                                | -7.6         | 6.2                                 | 1.0          |
| ENNB1    | 13.1                                              | 13.1         | 8.0                                | -2.9         | 8.9                                 | 0.5          | 24.6                                               | -2.8         | 7.6                                | 0.7          | 10.0                                | -1.9         |
| BEA      | 3.8                                               | 3.3          | 10.9                               | -15.9        | 9.0                                 | -11.1        | 16.0                                               | -2.1         | 12.9                               | -8.9         | 12.6                                | -6.6         |

**Table S9.** Results of the within-day and between-day precision and accuracy experiments for 25 mycotoxins in broiler chicken excreta.

| Analyte  | Within-Day Precision and Accuracy ( <i>n</i> = 6) |          |                                   |          |                                    |          | Between-Day Precision and Accuracy ( <i>n</i> = 6) |          |                                   |          |                                    |          |
|----------|---------------------------------------------------|----------|-----------------------------------|----------|------------------------------------|----------|----------------------------------------------------|----------|-----------------------------------|----------|------------------------------------|----------|
|          | Theoretical Concentration LOQ                     |          | Theoretical Concentration 10 ng/g |          | Theoretical Concentration 100 ng/g |          | Theoretical Concentration LOQ                      |          | Theoretical Concentration 10 ng/g |          | Theoretical Concentration 100 ng/g |          |
|          | Precision                                         | Accuracy | Precision                         | Accuracy | Precision                          | Accuracy | Precision                                          | Accuracy | Precision                         | Accuracy | Precision                          | Accuracy |
|          | (RSD %)                                           | (%)      | (RSD %)                           | (%)      | (RSD %)                            | (%)      | (RSD%)                                             | (%)      | (RSD%)                            | (%)      | (RSD %)                            | (%)      |
| ZEN      | 20.0                                              | -23.3    | 6.1                               | 8.5      | 2.8                                | 7.3      | 15.7                                               | -23.6    | 8.6                               | 2.6      | 10.4                               | 3.0      |
| AZEL     | 11.1                                              | -16.6    | 4.4                               | 7.3      | 3.8                                | 7.8      | 12.6                                               | -17.1    | 15.5                              | -3.7     | 12.7                               | -0.2     |
| AZAL     | 14.3                                              | 7.3      | 4.5                               | 0.7      | 4.9                                | 4.3      | 19.3                                               | -1.1     | 8.7                               | -5.0     | 12.3                               | -2.7     |
| BZAL     | 8.6                                               | 13.5     | 3.3                               | 2.8      | 3.4                                | 6.3      | 21.7                                               | 2.2      | 11.7                              | -4.3     | 13.3                               | -2.3     |
| BZEL     | 16.6                                              | -3.4     | 3.7                               | 2.4      | 2.5                                | 3.5      | 33.7                                               | 1.0      | 7.5                               | -0.5     | 6.2                                | -0.5     |
| ZAN      | 13.1                                              | -7.1     | 2.0                               | -0.1     | 2.5                                | 6.5      | 19.0                                               | -0.9     | 2.2                               | 1.1      | 8.6                                | 2.5      |
| TEA      | 20.1                                              | -15.9    | 8.4                               | -13.5    | 1.8                                | 8.6      | 20.8                                               | -16.8    | 9.5                               | -8.0     | 9.1                                | 2.7      |
| AOH      | 13.1                                              | -20.4    | 13.7                              | 3.1      | 3.2                                | 8.2      | 16.9                                               | -16.0    | 16.5                              | -4.0     | 14.4                               | 0.5      |
| AME      | 10.3                                              | 6.2      | 6.4                               | 1.9      | 7.0                                | -14.6    | 16.6                                               | -0.1     | 8.7                               | 0        | 12.6                               | -10.2    |
| DON      | 18.5                                              | 16.2     | 6.4                               | 7.3      | 4.4                                | 2.7      | 20.1                                               | 18.4     | 8.8                               | 3.8      | 6.1                                | 3.4      |
| DOM-1    | 10.5                                              | -2.2     | 3.3                               | 7.2      | 2.0                                | 8.0      | 27.4                                               | -17.2    | 6.0                               | 4.0      | 9.1                                | 4.2      |
| 3/15ADON | 9.3                                               | 7.0      | 12.5                              | -3.2     | 10.4                               | -14.3    | 15.4                                               | -0.1     | 11.8                              | -1.8     | 14.9                               | -14.6    |
| T2       | 6.9                                               | -10.5    | 2.3                               | 0.6      | 1.9                                | 4.4      | 13.0                                               | -10.8    | 4.1                               | -0.6     | 3.4                                | 4.5      |
| HT2      | 15.3                                              | -13.6    | 7.0                               | -9.8     | 3.6                                | 0.7      | 15.3                                               | -13.6    | 15.0                              | -4.7     | 7.0                                | 0.7      |
| T2G      | 17.0                                              | 7.7      | 7.2                               | -1.7     | 7.0                                | 7.7      | 13.3                                               | 8.7      | 6.4                               | -0.4     | 7.0                                | 5.4      |
| AFB1     | 10.7                                              | -25      | 1.6                               | -1.2     | 2.4                                | 1.5      | 13.4                                               | -23.2    | 3.4                               | 0.6      | 2.9                                | 1.6      |
| AFM1     | 21.0                                              | -15.3    | 1.7                               | 4.9      | 4.4                                | -10.6    | 14.2                                               | -1.2     | 14.5                              | -7.7     | 19.0                               | -4.5     |
| OTA      | 12.1                                              | -4.4     | 6.3                               | -2.5     | 5.1                                | -2.2     | 44.7                                               | -25.0    | 7.0                               | -0.8     | 8.9                                | -0.2     |
| ENN A1   | 11.9                                              | -30.8    | 2.6                               | 4.8      | 1.0                                | 5.5      | 23.9                                               | -20.8    | 2.5                               | 5.3      | 11.1                               | -0.4     |
| ENNA     | 21.9                                              | 12.5     | 7.7                               | -17.4    | 6.2                                | -17.1    | 23.9                                               | 0.9      | 13.5                              | -10.5    | 9.4                                | -12.5    |
| ENNB     | 20.0                                              | -16.1    | 2.2                               | 4.9      | 1.1                                | 3.7      | 20.0                                               | -14.2    | 2.4                               | 5.5      | 8.8                                | 0.6      |
| ENNB1    | 8.0                                               | -14.5    | 3.6                               | 5.3      | 3.2                                | 4.0      | 23.1                                               | -20.9    | 4.7                               | 4.4      | 13.4                               | -5.2     |
| BEA      | 21.4                                              | -8.5     | 1.9                               | 8.2      | 2.1                                | 8.8      | 43.7                                               | -17.5    | 6.2                               | 7.4      | 10.9                               | 1.0      |
| FB2      | -                                                 | -        | 5.6                               | 3.9      | 8.5                                | -0.4     | -                                                  | -        | 4.7                               | 3.6      | 7.9                                | 0.4      |

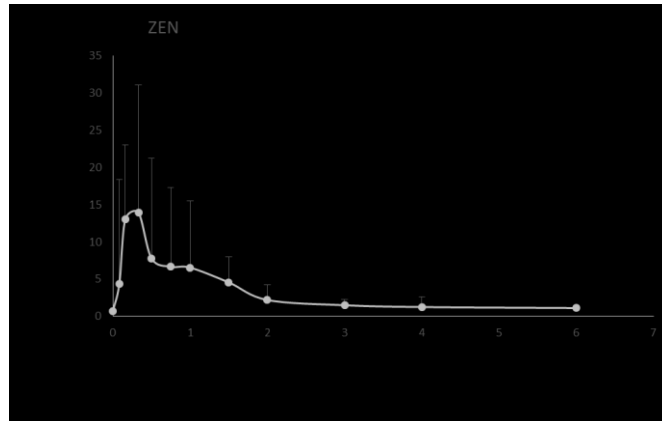

(a)

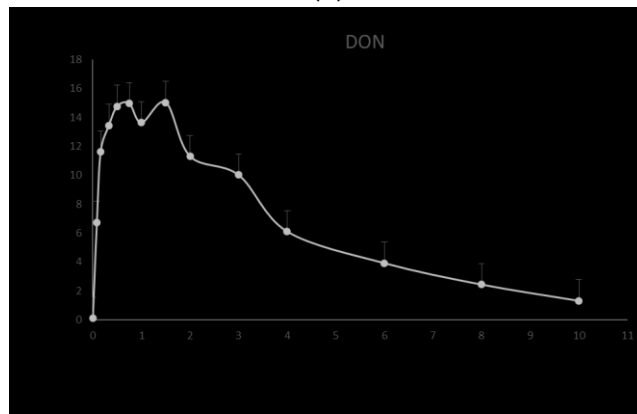

(b)

**Figure S2.** (a) Concentration-time curves of zearalenone (ZEN) in plasma after intragastric administration of ZEN (3 mg/kg bw) to pigs ( $n = 8$ ). The mean + SD is shown. (b) Concentration-time curves of deoxynivalenol (DON) in plasma after intragastric administration of DON (36  $\mu$ g/kg bw) to pigs ( $n = 8$ ). The mean + SD is shown.

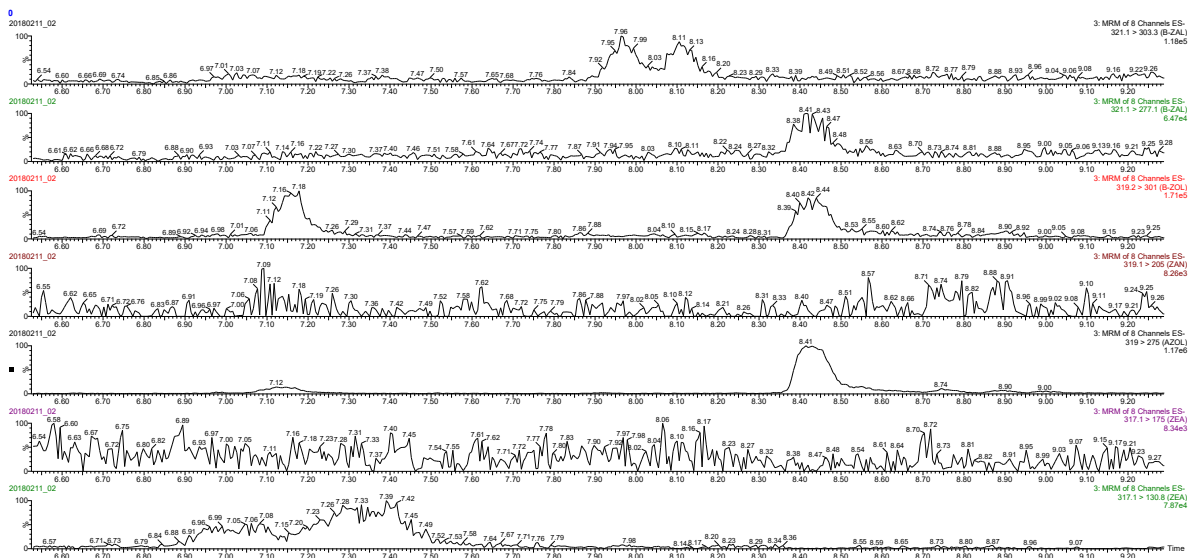

**Figure S3.** Zearalenone (ZEN) metabolites extracted ion chromatograms for a blank pig faeces sample.

**Table S10.** Results of signal suppression enhancement (SSE) and extraction recovery (RE) in pig plasma, urine and faeces spiked at 10 ng/mL or 10 ng/g.

| Analyte  | SSE (%)    |            |           | RE (%)     |            |           |
|----------|------------|------------|-----------|------------|------------|-----------|
|          | Pig Plasma | Pig Faeces | Pig Urine | Pig Plasma | Pig Faeces | Pig Urine |
| ZEN      | 86.2       | 35.4       | 90.6      | 87.5       | 88.3       | 81.2      |
| AZEL     | 74.7       | 22.4       | 84.8      | 88.1       | 93.4       | 80.5      |
| AZAL     | 73.0       | 18.5       | 85.8      | 83.6       | 72.6       | 78.8      |
| BZAL     | 74.4       | 30.5       | 85.1      | 83.0       | 60.5       | 79.9      |
| BZEL     | 79.2       | 40.3       | 85.5      | 81.9       | 99.9       | 79.8      |
| ZAN      | 86.5       | 30.3       | 90.6      | 83.5       | 66.7       | 79.5      |
| TEA      | 96.3       | 12.4       | 52.4      | 72.9       | 56.4       | 62.6      |
| AOH      | 114.9      | 13.5       | 11.1      | 87.4       | 88.5       | 212.8     |
| AME      | 90.1       | 22.7       | 73.6      | 91.8       | 86.2       | 80.5      |
| DON      | 40.4       | 27.5       | 79.5      | 95.4       | 266.1      | 67.3      |
| DOM-1    | 42.6       | 23.7       | 5.2       | 96.3       | 131.0      | 69.6      |
| 3/15ADON | 93.5       | 16.7       | 72.6      | 87.5       | 89.3       | 70.3      |
| T2       | 83.3       | 82.4       | 90.5      | 96.2       | 60.1       | 56.2      |
| HT2      | 61.7       | 62.8       | 100.4     | 110.6      | 93.4       | 75.1      |
| T2G      | 71.5       | 66.4       | 107.6     | 87.3       | 41.2       | 74.4      |
| AFB1     | 87.4       | 35.        | 72.4      | 79.5       | 59.3       | 60.0      |
| AFM1     | 50.1       | 35.3       | 79.3      | 85.9       | 61.4       | 62.0      |
| OTA      | 101.3      | 68.1       | 106.3     | 131.5      | 54.6       | 73.4      |
| ENN A1   | 62.1       | 78.6       | 81.3      | 79.2       | 48.2       | 80.3      |
| ENNA     | 66.8       | 304.5      | 80.2      | 132.2      | 61.9       | 79.6      |
| ENNB     | 50.9       | 61.9       | 83.7      | 90.0       | 68.6       | 79.5      |
| ENNB1    | 45.5       | 78.2       | 82.8      | 86.8       | 46.5       | 73.9      |
| BEA      | 64.3       | 108.9      | 89.5      | 92.1       | 69.1       | 78.9      |

**Table S11.** Results of signal suppression enhancement (SSE) and extraction recovery (RE) in broiler chicken plasma and excreta spiked at 10 ng/mL or 10 ng/g.

| Analyte  | SSE (%)        |                 | RE (%)         |                 |
|----------|----------------|-----------------|----------------|-----------------|
|          | Chicken Plasma | Chicken Excreta | Chicken Plasma | Chicken Excreta |
| ZEN      | 76.8           | 146.2           | 66.0           | 62.9            |
| AZEL     | 65.7           | 66.6            | 60.1           | 24.8            |
| AZAL     | 100.0          | 89.3            | 61.8           | 65.6            |
| BZAL     | 64.5           | 105.8           | 64.1           | 65.4            |
| BZEL     | 67.7           | 120.5           | 62.8           | 63.5            |
| ZAN      | 79.3           | 146.9           | 59.8           | 52.7            |
| TEA      | 121.9          | 21.0            | 63.8           | 64.4            |
| AOH      | 99.9           | 50.8            | 57.3           | 43.6            |
| AME      | 81.3           | 14.4            | 61.2           | 52.3            |
| DON      | 34.8           | 52.3            | 72.2           | 76.0            |
| DOM-1    | 41.6           | 41.5            | 71.4           | 90.5            |
| 3/15ADON | 53.5           | 67.5            | 82.0           | 84.6            |
| T2       | 110.8          | 89.9            | 73.4           | 70.0            |
| HT2      | 106.2          | 157.1           | 92.2           | 53.8            |
| T2G      | 112.6          | 85.2            | 63.5           | 57.3            |
| AFB1     | 93.2           | 126.7           | 51.6           | 63.7            |
| AFM1     | 72.3           | 359.4           | 67.9           | 15.7            |
| OTA      | 107.6          | 58.2            | 90.9           | 68.1            |
| ENN A1   | 135.5          | 90.3            | 66.2           | 70.2            |
| ENNA     | 73.9           | 821.6           | 87.5           | 54.8            |
| ENNB     | 78.4           | 73.1            | 70.0           | 80.1            |
| ENNB1    | 94.9           | 70.4            | 70.2           | 93.7            |
| BEA      | 92.4           | 80.7            | 70.0           | 73.6            |

Table S12. Chemical structure and pKa-values of the 26 mycotoxins.

| Analyte | Chemical Structure                                           | pKa and Log P or log D Value at pH 3 / pH 7 |  | Analyte | Chemical Structure                                            | pKa and Log P or log D Value at pH 3 / pH 7   |
|---------|--------------------------------------------------------------|---------------------------------------------|--|---------|---------------------------------------------------------------|-----------------------------------------------|
|         |                                                              |                                             |  |         |                                                               |                                               |
| ZEN     | <br>C <sub>18</sub> H <sub>22</sub> O <sub>5</sub><br>Acidic | pKa: 7.41 ± 0.4<br>Log P: 3.83 / 3.72       |  | T2      | <br>C <sub>24</sub> H <sub>34</sub> O <sub>9</sub><br>Neutral | pKa: 13.23 ± 0.7<br>Log P: 2.25 / 2.25        |
| AZEL    | <br>C <sub>18</sub> H <sub>24</sub> O <sub>5</sub><br>Acidic | pKa: 7.61 ± 0.6<br>Log P: 4.17 / 4.17       |  | HT2     | <br>C <sub>22</sub> H <sub>32</sub> O <sub>8</sub><br>Neutral | pKa: 13.26 ± 0.7<br>Log P: 2.27 / 2.27        |
| AZAL    | <br>C <sub>18</sub> H <sub>26</sub> O <sub>5</sub><br>Acidic | pKa: 8.6 (strongest acid)*<br>Log P: ± 4*   |  | T2G     | <br>C <sub>30</sub> H <sub>44</sub> O <sub>14</sub>           | pKa: /<br>Log P: /                            |
| BZAL    | <br>C <sub>18</sub> H <sub>26</sub> O <sub>5</sub><br>Acidic | pKa: 8.6 (strongest acid)*<br>Log P: ± 4*   |  | AFB1    | <br>C <sub>17</sub> H <sub>12</sub> O <sub>6</sub><br>Neutral | pKa: 17.79 (strongest acid)*<br>Log P: 0.45   |
| BZEL    | <br>C <sub>18</sub> H <sub>24</sub> O <sub>5</sub>           | pKa: 7.61 ± 0.6<br>Log P: 4.17 / 4.17       |  | AFM1    | <br>C <sub>17</sub> H <sub>12</sub> O <sub>7</sub>            | pKa: 11.42 (strongest acid)*<br>Log P: - 0.35 |

|     | Acidic                                                                                                                            |                                                                                        |        | Neutral                                                                                                                             |                                                                                           |
|-----|-----------------------------------------------------------------------------------------------------------------------------------|----------------------------------------------------------------------------------------|--------|-------------------------------------------------------------------------------------------------------------------------------------|-------------------------------------------------------------------------------------------|
| ZAN | <p><chem>C18H24O5</chem></p> 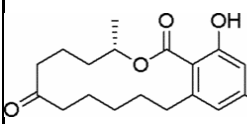                    | <p>pKa: /<br/>Log P: /</p>                                                             | OTA    |  <p><chem>C20H18ClNO6</chem></p>                  | <p>pKa: <math>3.29 \pm 0.1</math> / <math>-2.20 \pm 0.4</math><br/>log P: 4.41 / 1.10</p> |
| TEA |  <p><chem>C10H15NO3</chem></p> <p>Amphoteric</p> | <p>pKa: <math>4.5 \pm 1</math> / <math>-2.70 \pm 0.7</math><br/>Log P: 0.8 / -1.65</p> | ENN A1 |  <p><chem>C35H61N3O9</chem></p> <p>Amphoteric</p> | <p>pKa: <math>-1.44 \pm 0.7</math><br/>Log P: 4.11 / 4.11</p>                             |
| AOH |  <p><chem>C14H10O5</chem></p> <p>Acidic</p>    | <p>pKa: <math>7.16 \pm 0.20</math><br/>Log P: 3.3 / 3.06</p>                           | ENNA   |  <p><chem>C36H63N3O9</chem></p> <p>Basic</p>    | <p>pKa: <math>-0.96 \pm 0.7</math><br/>Log P: 4.64 / 4.64</p>                             |
| AME |  <p><chem>C15H12O5</chem></p> <p>Acidic</p>    | <p>pKa: <math>6.99 \pm 0.20</math><br/>Log P: 3.93 / 3.62</p>                          | ENN B  |  <p><chem>C33H57N3O9</chem></p> <p>Basic</p>    | <p>pKa: <math>-1.08 \pm 0.7</math><br/>Log P: 3.05 / 3.05</p>                             |

|         |                                                                                   |                                                                                |       |                                                  |                                                                                              |
|---------|-----------------------------------------------------------------------------------|--------------------------------------------------------------------------------|-------|--------------------------------------------------|----------------------------------------------------------------------------------------------|
| DON     | <p><chem>C15H20O6</chem></p> <p>Neutral</p>                                       | <p>pKa: <math>11.91 \pm 0.7</math><br/>Log P: <math>-1.41 / -1.41</math></p>   | ENNB1 | <p><chem>C34H59N3O9</chem></p> <p>Basic</p>      | <p>pKa: <math>-1.45 \pm 0.7</math><br/>Log P: <math>3.58 / 3.58</math></p>                   |
| DOM-1   | <p><a href="#">C<sub>15</sub>H<sub>20</sub>O<sub>5</sub></a></p> <p>Neutral**</p> | <p>pKa: /<br/>Log P: <math>-0.71</math><br/>(estimate)**</p>                   | BEA   | <p><chem>C45H57N3O9</chem></p> <p>Basic</p>      | <p>pKa: <math>18.8</math> (strongest acid)*<br/>Log P: <math>\pm 5.5</math> *</p>            |
| 15-ADON | <p><chem>C17H22O7</chem></p> <p>Neutral*</p>                                      | <p>pKa: <math>12</math> (strongest acid) *<br/>Log P: <math>-0.54</math> *</p> | FB1   | <p><chem>C34H59NO15</chem></p> <p>Amphoteric</p> | <p>pKa: <math>3.64 \pm 0.23 / 9.24 \pm 0.39</math><br/>Log P: <math>-0.61 / -3.23</math></p> |
| 3-ADON  | <p><chem>C17H22O7</chem></p> <p>Neutral</p>                                       | <p>pKa <math>11.84 \pm 0.7</math><br/>Log P: <math>-0.76 / -0.76</math></p>    | FB2   | <p><chem>C34H59NO14</chem></p> <p>Amphoteric</p> | <p>pKa: <math>3.64 \pm 0.23 / 9.25 \pm 0.39</math><br/>Log P: <math>1.58 / -1.04</math></p>  |

Source: E. Apfelthaler et al. [2] and \*Toxin and Toxin Target Database (T3DB) [1] \*\*Pubchem. / = not found; Acidic= acidic solute; Basic= basic solute; Neutral= neutral solute; Amphoteric = Amphoteric solute.
